# Supplementary material
Source: PubMed Central journal article supplement (PMC2574534)
Supplement: NIHMS68896-supplement-suppl.pdf [file NIHMS68896-supplement-suppl.pdf]

## Supporting Information

### Amphiphilic Block Copolymers Enhance Nuclear Entry of Polyplex-Delivered DNA

Zhihui Yang<sup>\*</sup>, Gaurav Sahay<sup>\*</sup>, Srikanth Sriadibhatla<sup>\*</sup>, Alexander V. Kabanov<sup>\*†</sup>

<sup>\*</sup>Center for Drug Delivery and Nanomedicine and Department of Pharmaceutical Sciences, College of Pharmacy, University of Nebraska Medical Center, 985830 Nebraska Medical center, Omaha, NE 68198-5830, United States and <sup>†</sup>Faculty of Chemistry, M.V. Lomonosov Moscow State University, 119899 Moscow, Russia

| Position | Symbol    | Refseq       | Description                                               | Folds increased |
|----------|-----------|--------------|-----------------------------------------------------------|-----------------|
| 3        | Atf1      | NM_007497    | Activating transcription factor 1                         | 2.9             |
| 4        | Atf2      | NM_009715    | Activating transcription factor 2                         | 4.6             |
| 30       | Hmgb1     | NM_010439    | High mobility group box 1                                 | 2.3             |
| 72       | Polr2a    | NM_009089    | Polymerase (RNA) II (DNA directed) polypeptide A          | 2.9             |
| 77       | Rel       | NM_009044    | Reticuloendotheliosis oncogene                            | 4.5             |
| 78       | Rela      | NM_009045    | V-rel reticuloendotheliosis viral oncogene homolog A      | 2.4             |
| 70       | Pcaf      | NM_020005    | P300/CBP-associated factor                                | 2.2             |
| 84       | Smad4     | NM_008540    | MAD homolog 4 (Drosophila)                                | 4.3             |
| 6        | Bcl3      | NM_033601    | B-cell leukemia/lymphoma 3                                | 3.3             |
| 10       | Card14    | NM_130886    | Caspase recruitment domain family, member 14              | 2.2             |
| 11       | Card4     | NM_172729    | Caspase recruitment domain 4                              | 2.2             |
| 108      | Tradd     | NM_001033161 | TNFRSF1A-associated via death domain                      | 3.2             |
| 110      | Traf3     | NM_011632    | Tnf receptor-associated factor 3                          | 2.1             |
| 112      | Traf6     | NM_009424    | Tnf receptor-associated factor 6                          | 2.8             |
| 66       | Nalp12    | XM_355971    | NACHT, LRR and PYD containing protein 12                  | 2.0             |
| 74       | Ppp5c     | NM_011155    | Protein phosphatase 5, catalytic subunit                  | 3.6             |
| 53       | Map2k6    | NM_011943    | Mitogen activated protein kinase kinase 6                 | 2.6             |
| 54       | Map3k1    | NM_011945    | Mitogen activated protein kinase kinase kinase 1          | 3.0             |
| 56       | Map3k3    | NM_011947    | Mitogen activated protein kinase kinase kinase 3          | 4.4             |
| 60       | Map4k2    | NM_009006    | Mitogen activated protein kinase kinase kinase kinase 2   | 4.4             |
| 61       | Mapk11    | NM_011161    | Mitogen-activated protein kinase 11                       | 4.4             |
| 64       | Mapk8     | NM_016700    | Mitogen activated protein kinase 8                        | 4.1             |
| 87       | Tgfbr1    | NM_009370    | Transforming growth factor, beta receptor I               | 2.1             |
| 88       | Tgfbr2    | NM_009371    | Transforming growth factor, beta receptor II              | 2.8             |
| 71       | Plk2      | NM_152804    | Polo-like kinase 2 (Drosophila)                           | 6.4             |
| 80       | Ripk1     | NM_009068    | Receptor (TNFRSF)-interacting serine-threonine kinase 1   | 4.0             |
| 99       | Tnfrsf10b | NM_020275    | Tumor necrosis factor receptor superfamily, member 10b    | 2.7             |
| 103      | Tnfrsf7   | NM_001033126 | Tumor necrosis factor receptor superfamily, member 7      | 4.4             |
| 100      | Tnfrsf1a  | NM_011609    | Tumor necrosis factor receptor superfamily, member 1a     | 2.3             |
| 113      | Vapa      | NM_013933    | Vesicle-associated membrane protein, associated protein A | 2.2             |
| 8        | Card10    | NM_130859    | Caspase recruitment domain family, member 10              | 5.1             |
| 105      | Tnfsf14   | NM_019418    | Tumor necrosis factor (ligand) superfamily, member 14     | 3.6             |
| 35       | Ikbkb     | NM_010546    | Inhibitor of KappaB Kinase beta                           | 1.6             |
| 5        | Bcl10     | NM_009740    | B-cell leukemia/lymphoma 10                               | 2.9             |
| 22       | Edaradd   | NM_133643    | EDAR (ectodysplasin-A receptor)-associated death domain   | 4.3             |
| 37       | Ikbkg     | NM_010547    | Inhibitor of KappaB Kinase gamma                          | 1.5             |
| 32       | Icam1     | NM_010493    | Intercellular adhesion molecule                           | 3.9             |
| 42       | Il6       | NM_031168    | Interleukin 6                                             | 2.5             |
| 48       | Lta       | NM_010735    | Lymphotoxin A                                             | 4.7             |

**Table S-1.** Effect of Pluronic P85 on the expression of NF $\kappa$ B related genes in C2C12-CMV<sup>luc</sup> cells. Cells were exposed to 1% Pluronic P85 for 5 min, washed by PBS and incubated for additional 3 h. Total RNA was assayed using Oligo GEArray® Mouse NF $\kappa$ B Signaling Pathway Microarray (see **Figure 7** for a representative gene array) and gene expression was analyzed by GEArray Expression Analysis Suite software (see [http://www.superarray.com/gene\\_array\\_product/HTML/OMM-025.html](http://www.superarray.com/gene_array_product/HTML/OMM-025.html) for detailed list of genes and layout). Only genes exhibiting at least 2-fold increase in expression are presented. (i) NF $\kappa$ B pathway: (3, 4, 30, 72, 77, 78, 70, 84) transcription factors; (6, 10, 11, 108, 110, 112, 66, 74) other factors; (53, 54, 56, 60, 61, 64, 87, 88, 71, 80) kinases; (99, 103) ligands and receptors; (100, 113) inflammatory response, extracellular or membrane molecules. (ii) activation of NF $\kappa$ B pathway: (8, 105) ligands and receptors; (35, 5, 22) I $\kappa$ B kinase/NF $\kappa$ B cascade; (37) transcription factor; (32) extracellular or membrane molecules; (iii) NF $\kappa$ B responsive genes: (42, 48) ligands and receptors, or cytokines.
